# Supplementary material for: BnaA03.MKK5-BnaA06.MPK3/BnaC03.MPK3 Module Positively Contributes to Sclerotinia sclerotiorum Resistance in Brassica napus
Source: Plants (Basel). 2022 Feb 24;11(5):609. doi: 10.3390/plants11050609 (PMC8912397; doi:10.3390/plants11050609)
Supplement: Supplementary file 1 [file plants-11-00609-s001.zip › Supplementary Figures.pdf]

```

BnaA03.MKK5 : -----MRNRKRPDLSLPLENRNVALA : 21
BnaA01.MKK5 : -----MNIQPPPP--SPVKS-----RFRKRDPDLSLPLENRDVALA : 33
BnaC01.MKK5 : -----MKPIQPPPP--SPVKN-----RFRKRDPDLSLPLENRDVALA : 33
BnaC03.MKK5 : MPCLHLALFLDVHQVSYLLHLIISRVPDFSLAAISRSCTFPTREEDRDTVIEAMRSKCPDILQLNERNVALA : 75
AtMKK5 : -----MKPIQSPSGVASPVKN-----RLKRDPDLSLPLENRDVALA : 36
BnaA05.MKK4 : -----MKPIQPPPGVTGVPKN-----RPRRRPDLSLPLENRDVSALA : 36
BnaA08.MKK4 : -----MKPVQSAP-----VKS-----RPRRRPDLSLPLEQRDVSALA : 31
BnaC03.MKK4 : -----MKPVQSAP-----VKS-----RPRRRPDLSLPLEQRDVSALA : 31
BnaC06.MKK4 : -----MKPVQSAP-----VKS-----RPRRRPDLSLPLEQRDVSALA : -
AtMKK4 : -----MRPIQSPPGVSVPVKS-----RPRRRPDLTLPLEQRDVSALA : 36

BnaA03.MKK5 : VPLPLPPPPSS-----SSALASSSAISTNISAAIRLSELAIVNRIGSGAGGTVYKVIHLPTRSPFALKVIY : 87
BnaA01.MKK5 : VPLPLPPPPST-----TSAPTSGSAISPVSAAASLSELEIVNRIGSGAGGTVYKVIHLPTRSKPFALKVIY : 99
BnaC01.MKK5 : VPLPLPPPPST-----TSAPASGSAIS-----AAASLSELEIVNRIGSGAGGTVYKVIHLPTRSKPFALKVIY : 95
BnaC03.MKK5 : VPLPLPPPPSS-----SS-----SAAASLSELENVSIRIGSGTGGTVYKVIHLPTRLRIIFALKVIY : 129
AtMKK5 : VPLPLPPPPSS-----SSAPASSSAISTNISAAASLSELEIVNRIGSGAGGTVYKVIHLPTRSPFALKVIY : 102
BnaA05.MKK4 : VPLPLPPTSGG-----STT-----SEPISYSDIVGNRIGSGAGGTVYKVIHLPTRSRVYALKILN : 91
BnaA08.MKK4 : VPLPLPPTSSG-----SSSSSSAPSSSTGSSAPVNYSDLEGNRIGSGAGGTVYKVIHLPTRSRVYALKVIY : 96
BnaC03.MKK4 : VPLPLPPTSGG-----SSSSSSSSSSSSAAPVNYSDLEGNRIGSGAGGTVYKVIHLPTRSSRVYALKVIY : 96
BnaC06.MKK4 : -----SSSSSSSSSSSSAAPVNYSDLEGNRIGSGAGGTVYKVIHLPTRSSRVYALKVIY : -
AtMKK4 : VPLPLPPTSGGSGGSSGSAPS-----SSGSASSTNTNNSIEAVNYSDLVGNRIGSGAGGTVYKVIHLPSSRLYALKVIY : 111

BnaA03.MKK5 : GNHDDNVFRQICREIEILRSVDHNPVVKCHDMFDHNGEVOVLEFMDGCSLEGRVSVREDEIADITRQILSLGLAY : 162
BnaA01.MKK5 : GNHEDNVFRQICREIEILRSVDHANVVKCHDMFDHNGEIOVLEFMDGCGLEGVSVSRDEEISDMSRQILSLGLAY : 174
BnaC01.MKK5 : GNHEDNVFRQICREIEILRSVDHANVVKCHDMFDHNGEIOVLEFMDGCGLEGVSVSRDEEISDMSRQILSLGLAY : 170
BnaC03.MKK5 : CHHEDNVFRQICREIEILRSVDHNPVVKCHDMFELAGEVHVILLEFMDNGSLECARVCEDEIADITRQILSLGLAY : 204
AtMKK5 : GNHEDTVFRQICREIEILRSVDHNPVVKCHDMFDHNGEIOVLEFMDGCSLECAHIWQEOBDEIADITRQILSLGLAY : 177
BnaA05.MKK4 : GNHDDTVFRGHICREIKILRDVNHNPVVKCHDMFDHNGEIOVLEFMDGCSLECAVSNQOHPSDLSRQILKGLAY : 166
BnaA08.MKK4 : GNHEENVFRQICREIEILRDVNHQINIVKCHDMFDHNGEIOVLEFMDGCSLENRVSNRERDAHLSHQILNGLAY : 171
BnaC03.MKK4 : GNHEENVFRQICREIEILRDVSHQINIVKCHDMFDHNGEIOVLEFMDGCSLENRVSNRERDAHLSHQILNGLAY : 171
BnaC06.MKK4 : -----MFDHNGEIOVLEFMDGCSLECAHISNEQOOSDLSRQILNGLAY : 44
AtMKK4 : GNHEETVFRQICREIEILRDVNHNPVVKCHDMFDHNGEIOVLEFMDGCSLECAHVWKEQOOLADLSRQILSLGLAY : 186

activation loop

BnaA03.MKK5 : LHRHRIHVHRDIKPSNLLINSANNVKIADFGVSRILAQTMDPCNSSVGTIAYMSPERINTDLNHGRYDGMAGDIWS : 237
BnaA01.MKK5 : LHRHRIHVHRDIKPSNLLIDSEKNVKIADFGVSRILAQTMDPCNSSVGTIAYMSPERINTDLNHGRYNGMAGDVWS : 249
BnaC01.MKK5 : LHRHRIHVHRDIKPSNLLIDSEKNVKIADFGVSRILAQTMDPCNSSVGTIAYMSPERINTDLNHGRYNGMAGDVWS : 245
BnaC03.MKK5 : LHGRHIVHRDIKPSNLLINSANNVKIADFGVSRILAQTMDPCNSSVGTIVAYMSPERIDSDQNDGRYDCAGDIWS : 279
AtMKK5 : LHRHRIHVHRDIKPSNLLINSANNVKIADFGVSRILAQTMDPCNSSVGTIAYMSPERINTDLNHGRYDGMAGDVWS : 252
BnaA05.MKK4 : LHGRHIVHRDIKPSNLLINSNNVKIADFGVSRVLAQTLSPOKSSVGTIAYMSPERINTDLNQGYYDCRAGDIWS : 241
BnaA08.MKK4 : LHGRHIVHRDIKPSNLLINSKIVKIADFGVSRILAQTMDPCNSSVGTIAYMSPERINTDLNQGYYDCRAGDIWS : 246
BnaC03.MKK4 : LHGRHIVHRDIKPSNLLINSKIVKIADFGVSRILAQTMDPCNSSVGTIAYMSPERINTDLNQGYYDCRAGDIWS : 246
BnaC06.MKK4 : LHGRHIVHRDIKPSNLLINSNNVKIADFGVSRVLAQTLSPOKSSVGTIAYMSPERINTDLNQGYYDCRAGDIWS : 119
AtMKK4 : LHGRHIVHRDIKPSNLLINSANNVKIADFGVSRILAQTMDPCNSSVGTIAYMSPERINTDLNQGYYDCRAGDIWS : 261

BnaA03.MKK5 : LGVSVLEFYLGRFPFPAVSROGDWASLMCAICMTOPPEAPATASEEFRHFISCCLOSDPEKRWASAOQLQHPPFIVK : 312
BnaA01.MKK5 : LGVSILEFYLGRFPFPAVSROGDWASLMCAICMSQPPEAPATASEEFRHFVSCCLOSDPEKRWASAOQLQHPPFIVK : 324
BnaC01.MKK5 : LGVSVLEFYLGRFPFPAVSROGDWASLMCAICMSQPPEAPATASEEFRHFVSCCLOSDPEKRWASAOQLQHPPFIVK : 320
BnaC03.MKK5 : LGVSILEFYLGRFPFVVSROGDWASLMCAICMNPPEAPATASEEFRHFISCCLOSDPEKRWASAOQLQHPPFIVK : 354
AtMKK5 : LGVSILEFYLGRFPFPAVSROGDWASLMCAICMSQPPEAPATASEEFRHFVSCCLOSDPEKRWASAOQLQHPPFIVK : 327
BnaA05.MKK4 : FGVSVLEFFLGRFPFNNVRLGDWASLMCAICMSKPPEAPATASEEFRHFVSCCLOREPARRRQTAQQLQHPPFIVR : 316
BnaA08.MKK4 : LGVSILEFYLGRFPFNVSRROGDWASLMCAICMSQPPEAPATASPDFRNFISCCLOREPARRRQTAQQLQHPPFIVR : 321
BnaC03.MKK4 : LGVSILEFYLGRFPFNVSRROGDWASLMCAICMSQPPEAPATASPDFRHFISCCLOREPARRRQTAQQLQHPPFIVR : 321
BnaC06.MKK4 : FGVSVLEFFLGRFPFNNVRLGDWASLMCAICMSKPPEAPATASEEFRHFVSCCLOREPARRRQTAQQLQHPPFIVR : 194
AtMKK4 : LGVSILEFYLGRFPFVVSROGDWASLMCAICMSQPPEAPATASEEFRHFISCCLOREPARRRQTAQQLQHPPFIVR : 336

BnaA03.MKK5 : -----SSGGLNIRQMLPPPPAS*----- : 330
BnaA01.MKK5 : -----STRAPGS*----- : 331
BnaC01.MKK5 : -----STRAPAS*----- : 327
BnaC03.MKK5 : -----STGGPNVP*----- : 362
AtMKK5 : -----ATGGPNIRQMLPPPRPLPSAS*----- : 348
BnaA05.MKK4 : GASQSQNRSPQNLHQLLPPPH----- : 337
BnaA08.MKK4 : AVGGQQRSPQNLHQLLPPPPRTLSSSSSS-PTT* : 355
BnaC03.MKK4 : AVSQGLNRSPQNLHQLLPPPPRTLSSSSSSSPTT* : 356
BnaC06.MKK4 : GAIQSQNRSPQNLHQLLPPPH*----- : 215
AtMKK4 : -ASPSQNRSPQNLHQLLPPPRP----LSSSSSPTT* : 366

```

**Figure S1:** Sequence alignment of identified MPK4/5 copies in *Brassica napus* and *Arabidopsis*. Amino acid sequences were used for alignment, and the identical amino acids and similar amino acids were displayed with black and grey shading respectively. The activation loop was marked with red square frame, and conserved Ser/Thr was highlighted in blue.

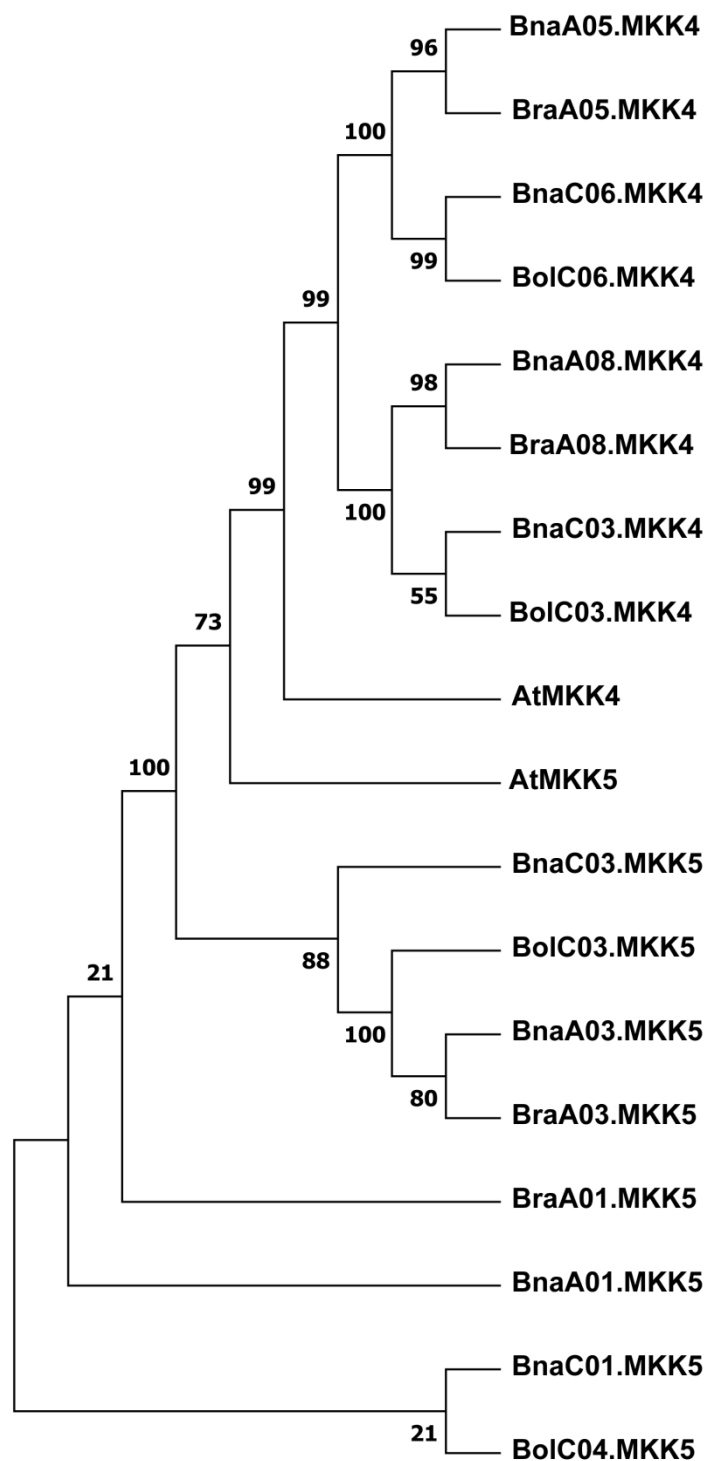

**Figure S2:** Phylogenetic analysis showing the relationship between each copy of B. napus MKK5 and MKK4/5 in *Brassica* species, as well as MKK4/5 in *Arabidopsis*.

```

BnaA06.MPK3 : MNNAGGQ-----YDFEPAVQTHGGQFISYDIFGSLFEVTSKYRPPIVPIG : 45
BnaC03.MPK3 : MNNAGGQ-----YDFEPAVQTHGGQFISYDIFGSLFEVTSKYRPPIVPIG : 45
BnaC04.MPK6 : MDGNAGQPAADTEMSEAP--SQSPSPQMPGVENIPATLSHGGKFTQYNIFGNIFEVTAKYKPPIMPIG : 65
BnaA05.MPK6 : MDGNAGQPAADTEMSEAP--SNPSPQVPGIENIPATLSHGGKFTQYNIFGNIFEVTAKYKPPIMPIG : 65
BnaA03.MPK6 : MDGGTGQPAADTEMSEATGGAAPSQMPGKIENIPATLSHGGMFTQYNIFGNIFEVTAKYSPPIIMPIG : 67
BnaC03.MPK6 : MDGGTGQPAADTEMSEASGGAVASQMPGKENIPATLSHGGKFTQYNIFGNIFEVTAKYNPPIMPIG : 67

BnaA06.MPK3 : RGAYGIVCSVLDSETNELVAMKKIANAFDNHMDAKRTLREIKLLRHLDHENIIAIRDVVPPLRRQF : 112
BnaC03.MPK3 : RGAYGIVCSVLDSETNELVAMKKIANAFDNHMDAKRTLREIKLLRHLDHENIIAIRDVVPPLRREF : 112
BnaC04.MPK6 : KGAYGIVCSAMNSETNESVAIKKIANAFDNKIDAKRTLREIKLLRHMDHENIVAIRDIIIPPPLRNAF : 132
BnaA05.MPK6 : KGAYGIVCSAMNSETNESVAIKKIANAFDNKIDAKRTLREIKLLRHMDHENIVAIRDIIIPPPLRNAF : 132
BnaA03.MPK6 : KGAYGIVCSAMNSETNESVAIKKIANAFDNKIDAKRTLREIKLLRHMDHENIVAIRDIIIPPPLRTAF : 134
BnaC03.MPK6 : KGAYGIVCSAMNSETNESVAIKKIANAFDNKIDAKRTLREIKLLRHMDHENIVAIRDIIIPPPLRTAF : 134

BnaA06.MPK3 : SDVYIAELMDTDLHQIIRSNQGLSEEHQCYFLYQLLRGLKYIHSKVIHRDLKPSNLLLNANCDLK : 179
BnaC03.MPK3 : SDVYIAELMDTDLHQIIRSNQGLSEEHQCYFLYQLLRGLKYIHSKVIHRDLKPSNLLLNANCDLK : 179
BnaC04.MPK6 : NDVYIAELMDTDLHQIIRSNQGLSEEHQCYFLYQILRGLKYIHSANVLHRDLKPSNLLLNANCDLK : 199
BnaA05.MPK6 : NDVYIAELMDTDLHQIIRSNQGLSEEHQCYFLYQILRGLKYIHSANVLHRDLKPSNLLLNANCDLK : 199
BnaA03.MPK6 : NDVYIAELMDTDLHQIIRSNQGLSEEHQCYFLYQILRGLKYIHSANVLHRDLKPSNLLLNANCDLK : 201
BnaC03.MPK6 : NDVYIAELMDTDLHQIIRSNQGLSEEHQCYFLYQILRGLKYIHSANVLHRDLKPSNLLLNANCDLK : 201

BnaA06.MPK3 : ICDFGLARPTSENEFMTEYVVTWRWYRAPELLLNSSDYTAADVWSVGCIFMELMNRKPLFPGRDHVH : 246
BnaC03.MPK3 : ICDFGLARPTSENEFMTEYVVTWRWYRAPELLLNSSDYTAADVWSVGCIFMELMNRKPLFPGRDHVH : 246
BnaC04.MPK6 : ICDFGLARVTSESDFMTEYVVTWRWYRAPELLLNSSDYTAADVWSVGCIFMELMDRKPLFPGRDHVH : 266
BnaA05.MPK6 : ICDFGLARVTSESDFMTEYVVTWRWYRAPELLLNSSDYTAADVWSVGCIFMELMDRKPLFPGRDHVH : 266
BnaA03.MPK6 : ICDFGLARVNSESDFMTEYVVTWRWYRAPELLLNSSDYTAADVWSVGCIFMELMDRKPLFPGRDHVH : 268
BnaC03.MPK6 : ICDFGLARVNSESDFMTEYVVTWRWYRAPELLLNSSDYTAADVWSVGCIFMELMDRKPLFPGRDHVH : 268

BnaA06.MPK3 : QMRLLTELLGTPTESDLCGTHNEDAKRYIROLNFPFROPLAKLSESHVNLPLAIDLVDRLMTEFDPKRI : 313
BnaC03.MPK3 : QMRLLTELLGTPTESDLCGTHNEDAKRYIROLNFPFROPLAKLSESHVNSLAIDLVDRLMTEFDPKRI : 313
BnaC04.MPK6 : QLRLLMELIGTPSEEELEFLN-ENAKRYIKQLPEYPROSLTDKEPNVHPLAIDLIEKMLTEFDPKRI : 332
BnaA05.MPK6 : QLRLLMELIGTPSEEELEFLN-ENAKRYIKQLPEYPROSLTDKEPNVHPLAIDLIEKMLTEFDPKRI : 332
BnaA03.MPK6 : QLRLLMELIGTPSEQVEEFLN-ENAKRYIROLPEYPROSITDKKEPNVHPLAIDLIEKMLTEFDPKRI : 334
BnaC03.MPK6 : QLRLLMELIGTPSEQVEEFLN-ENAKRYIROLPEYPROSITDKKEPNVHPLAIDLIEKMLTEFDPKRI : 334

common docking site
BnaA06.MPK3 : TVEEALNHPYLAKLHDPNDEPTCLKPFSFDFEQQLDEEQIKEMIYREAIANPTYA*---- : 370
BnaC03.MPK3 : TVEEALNHPYLAKLHDPNDEPTCLKPFSFDFEQQLDEEQIKEMIYREAIANPTYA*---- : 370
BnaC04.MPK6 : TVLDALAHPYLNSLHDISDEPECVTPENFDFEQHALSEEQMKELIYREALAENPEYQQIV*- : 392
BnaA05.MPK6 : TVLDALAHPYLNSLHDISDEPECVTPENFDFEQHALSEEQMKELIYREALAENPEYQQIV*- : 392
BnaA03.MPK6 : TVLDALAHPYLNSLHDISDEPECVTPENFDFEQHALSEEQMKELIYREALAENPEYQTAIA* : 395
BnaC03.MPK6 : TVLDALAHPYLNSLHDISDEPECVTPENFDFEQHALSEEQMKELIYREALAENPEYQPAIA* : 395

```

**Figure S3:** Sequence alignment of *B. napus* MPK3/6 copies. The identical amino acids and similar amino acids were displayed with black and grey shading respectively. TEY motif was marked with red; common docking site was marked with red square frame, and two adjacent acidic residues was highlighted in blue.
