# Supplementary material for: BnaA03.MKK5-BnaA06.MPK3/BnaC03.MPK3 Module Positively Contributes to Sclerotinia sclerotiorum Resistance in Brassica napus
Source: Plants (Basel). 2022 Feb 24;11(5):609. doi: 10.3390/plants11050609 (PMC8912397; doi:10.3390/plants11050609)
Supplement: Supplementary file 1 [file plants-11-00609-s001.zip › Table S1.pdf]

**Table S1:** Lesion areas of infected oilseed rape leaves after 48 h incubation with *S. Sclerotiorum*

A: Lesion areas of *BnaA03.MKK4* overexpression lines

| Sample ID   | Lesion area(cm <sup>2</sup> ) |       |       | Mean value | P value     |
|-------------|-------------------------------|-------|-------|------------|-------------|
| MKK4-OE #6  | 1.995                         | 2.478 | 2.352 | 2.275      | 0.002375136 |
| MKK4-OE #11 | 2.862                         | 1.472 | 1.748 | 2.027      | 0.015821433 |
| MKK4-OE #12 | 2.38                          | 2.091 | 4.702 | 3.058      | 0.378975367 |
| MKK4-OE #14 | 1.696                         | 2.063 | 2.899 | 2.219      | 0.014063069 |
| MKK4-OE #15 | 2.276                         | 1.06  | 2.191 | 1.842      | 0.009126593 |
| MKK4-OE #16 | 2.266                         | 1.584 | 2.261 | 2.037      | 0.003196917 |
| MKK4-OE #23 | 3.832                         | 4.321 | 4.003 | 4.052      | 0.541635051 |
| WT          | 4.076                         | 3.521 | 4.088 | 3.895      |             |

B: Lesion areas of *BnMPK3* transgenic lines

| Sample ID      | Lesion area(cm <sup>2</sup> ) |        |       | Mean value | P value     |
|----------------|-------------------------------|--------|-------|------------|-------------|
| MPK3-A6-OE #3  | 1.517                         | 1.628  | 2.703 | 1.949      | 0.024422845 |
| MPK3-A6-OE #4  | 1.95                          | 2.122  | 2.626 | 2.233      | 0.008393751 |
| MPK3-A6-OE #8  | 1.536                         | 1.068  | 2.397 | 1.667      | 0.014486075 |
| MPK3-C3-OE #16 | 1.7                           | 2.475  | 2.239 | 2.138      | 0.008948213 |
| MPK3-C3-OE #25 | 1.941                         | 2.594  | 1.315 | 1.950      | 0.02277573  |
| MPK3-C3-OE #30 | 1.54                          | 2.167  | 2.287 | 1.998      | 0.006212795 |
| MPK3-CR #44    | 4.054                         | 4.22   | 4.696 | 4.323      | 0.010006986 |
| MPK3-CR #49    | 4.194                         | 4.7745 | 6.135 | 5.035      | 0.042974373 |
| MPK3-CR #61    | 5.0265                        | 4.275  | 4.683 | 4.662      | 0.005028396 |
| WT             | 3.208                         | 3.524  | 3.247 | 3.326      |             |
