# Supplementary material for: BnaA03.MKK5-BnaA06.MPK3/BnaC03.MPK3 Module Positively Contributes to Sclerotinia sclerotiorum Resistance in Brassica napus
Source: Plants (Basel). 2022 Feb 24;11(5):609. doi: 10.3390/plants11050609 (PMC8912397; doi:10.3390/plants11050609)
Supplement: Supplementary file 1 [file plants-11-00609-s001.zip › Table S2.xlsx]

## Sheet: Sheet1
Table S2: Primers used in this study
Primers for constructs in plant transformation
Primer name	Primer sequence (5'-3')
BnMPK3-A6C3-Sal1-F	ACGCGTCGACATGAACAACGCCGGCGGCCAA
BnMPK3-A6C3-Kpn1-R	GGGGTACCAGCATATGTTGGATTGAGTGCA
BnMPK3sgRNA1	TCGGCTAAAGTTATCCACA
BnMPK3sgRNA2	GAACAACAACCTCTAGACG
BnA03MKK5-Kpn1-F	GGGGTACCATGAGACGAAACAAACGTCC
BnA03MKK5-Sal1-R	ACGCGTCGACCTAAGACGCCGGAGG
Primers for quantitative real-time PCR
Primer name	Primer sequence (5'-3')
BnACTIN2-F	CATCCATCGTCCACAG
BnACTIN2-R	ATCATCACAAGCATCCTT
BnA06MPK3-F	TCATCCGATTACACTGCTGCTATT
BnA06MPK3-R	GTCAACTAGATCAATGGCCAACGG
BnC03MPK3-F	CTCATCTGATTACACAGCTGCTATA
BnC03MPK3-R	TCAACTAGATCAATGGCCAATGAG
BnA03MKK5-F	GGAGTCTTGGTGTTAGCGTG
BnA03MKK5-R	CAGACCACCTCTTAGGAGGG
BnPAD3-F	TCAGATTACACCCAGCTGCTCC
BnPAD3-R	TCTATCGAACTCTCCAGAAACC
BnCYP71A13-F	TGCAAGAACATCTAGAAGCTGGT
BnCYP71A13-R	CAGTTCCGTCATGGTCCATTCTA
Primers for Y2H
Primer name	Primer sequence (5'-3')
BnMPK3-A6C3-EcoR1-F	CGGAATTCATGAACAACGCCGGCGGCCAA
BnMPK3-A6C3-EcoR1-R	CGGAATTCCTAAGCATATGTTGGATTGAGTGCA
BnMKK5-EcoR1-F	CGGAATTCATGAGACGAAACAAACGTCC
BnMKK5-EcoR1-R	CGGAATTCCTAAGACGCCGGAGG
Primers for CoIP
Primer name	Primer sequence (5'-3')
BnMPK3-A6C3-GFP-F	tataacattacgccgaggcctATGAACAACGCCGGCGGCCAA
BnMPK3-A6C3-GFP-R	caccatatagggaagaggcctAGCATATGTTGGATTGAGTGCA
BnMKK5-FLAG-F	tataacattacgccgaggcctATGAGACGAAACAAACGTCC
BnMKK5-FLAG-R	gtaatcatagggaagaggcctAGACGCCGGAGG
Primers for phosphorylation assay
Primer name	Primer sequence (5'-3')
His-BnMKK5DD-F	CCATGGCTGATATCGGATCCATGAGACGAAACAAACGTCC
His-BnMKK5DD-R	GCGGCCGCAAGCTTGTCGACCTAAGACGCCGGAGG
GST-BnMPK3-A6C3-F	ATCTGGTTCCGCGTGGATCCATGAACAACGCCGGCGGCCAA
GST-BnMPK3-A6C3-R	ATGCGGCCGCTCGAGTCGACCTAAGCATATGTTGGATTGAGTGCA
